# Supplementary material
Source: PubMed Central journal article supplement (PMC6544865)
Supplement: supp_RA118.005953_140910_2_supp_311397_ppnngf.pdf [file supp_RA118.005953_140910_2_supp_311397_ppnngf.pdf]

## Supporting Information

### **H<sub>2</sub>O<sub>2</sub> induces nuclear transport of the receptor tyrosine kinase c-MET in breast cancer cells via a membrane-bounded retrograde trafficking mechanism**

Mei-Kuang Chen, Yi Du, Linlin Sun, Jennifer L. Hsu, Yu-Han Wang, Yuan Gao, Jiaying Huang and Mien-Chie Hung

#### **Supporting information includes the following:**

Figure S1. Nuclear accumulation of full-length c-MET in breast cancer cells after different chemotherapy drug treatments.

Figure S2. Prolonged HGF stimulate full-length c-MET nuclear accumulation in breast cancer cells.

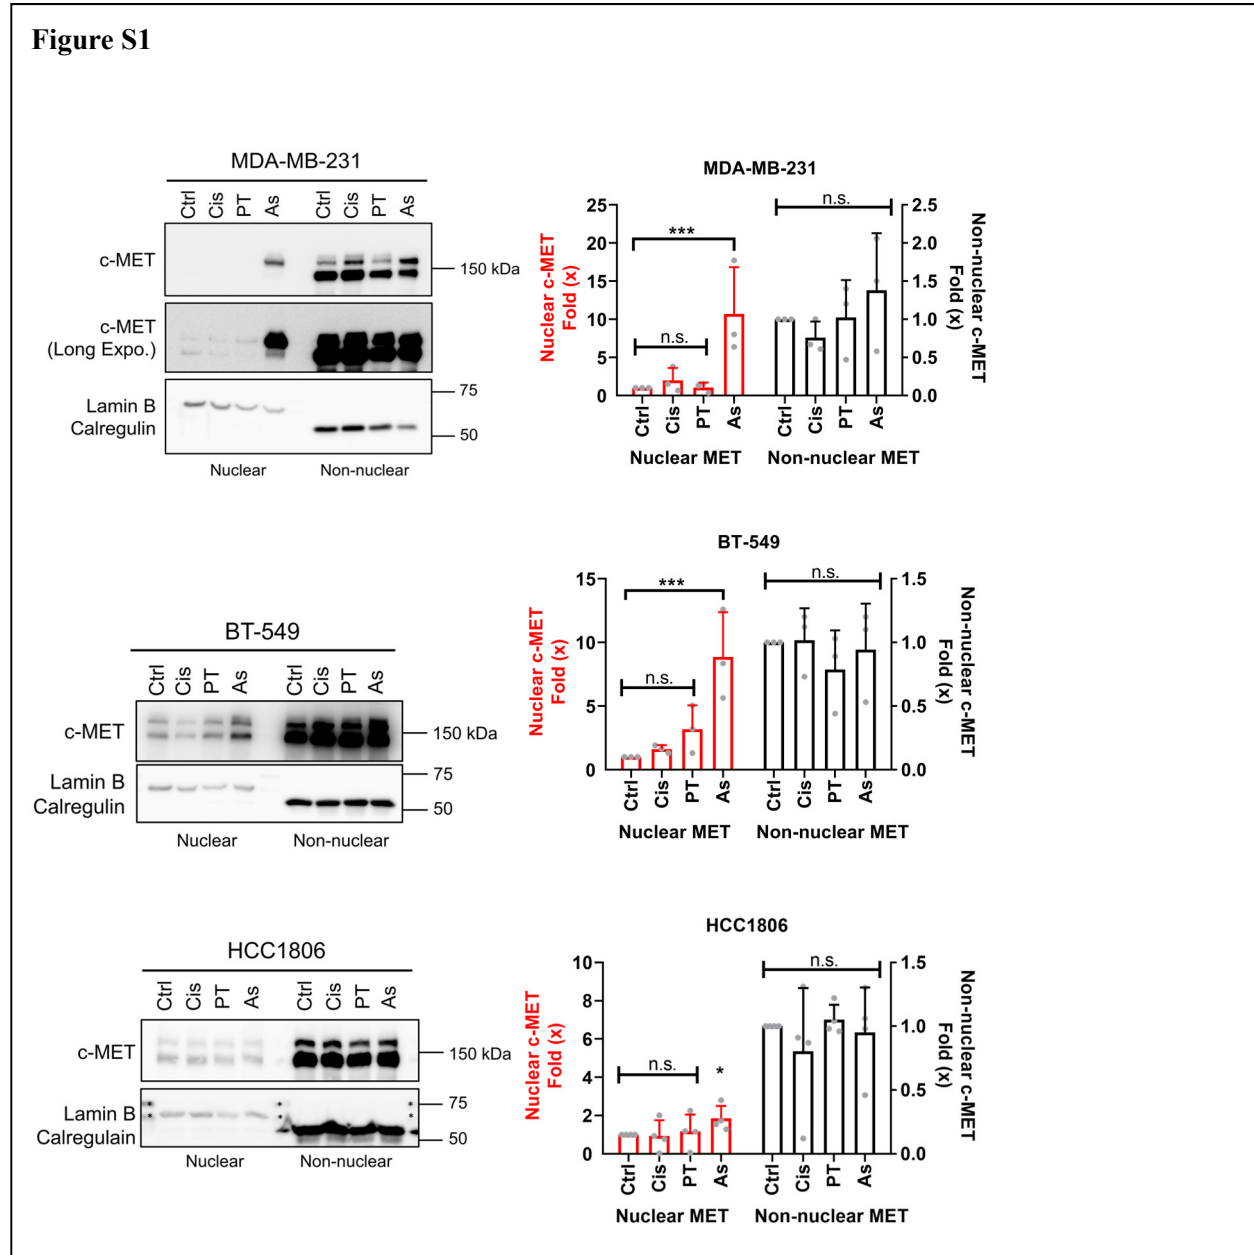

**Fig S1. Nuclear accumulation of full-length c-MET in breast cancer cells after different chemotherapy drug treatments.** Cells were treated overnight with either DMSO (Ctrl), 10  $\mu$ M cisplatin (Cis), 1  $\mu$ M paclitaxel (PT), or 10  $\mu$ M sodium arsenite (As) overnight before harvested and subjected to cellular fractionation. Lamin B and calregulin were used as markers for nuclear and non-nuclear fractions. Fold change (x) of three independent experiments for MDA-MB-231 and BT-549 are indicated in histogram with mean  $\pm$  S.D. Individual values are shown in dots. Fold change (x) of four independent HCC1806 experiments are indicated in histogram with mean  $\pm$  S.D.

Figure S2.

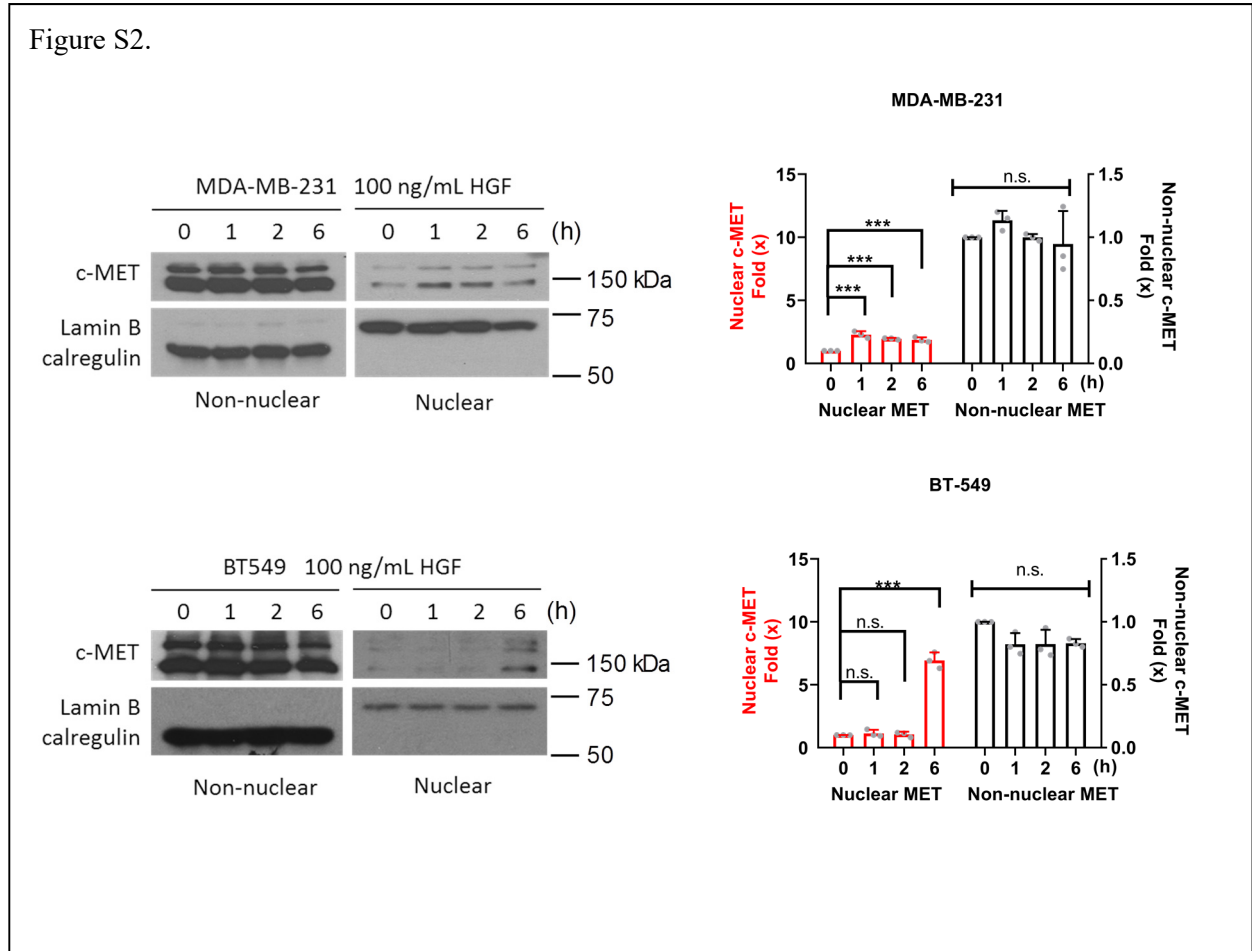

**Fig. S2 Prolonged HGF stimulate full-length c-MET nuclear accumulation in breast cancer cells.** MDA-MB-231 and BT-549 cells were treated with 100 ng/ml HGF for times indicated. Lamin B and calregulin were used as markers for nuclear and non-nuclear fractions. Statistical analysis of prolonged treatment and full-length c-MET nuclear accumulations in both cell lines. Fold change (x) of three independent experiments are indicated in histogram with mean  $\pm$  S.D.
